# Supplementary material for: Moderate-Intensity Rosuvastatin/Ezetimibe Combination versus Quadruple-Dose Rosuvastatin Monotherapy: A Meta-Analysis and Systemic Review
Source: PubMed Central journal article supplement — Yonsei Med J. 2023 Dec 13;65(1):19–26. doi: 10.3349/ymj.2023.0285 (PMC10774651; doi:10.3349/ymj.2023.0285), 2023-12-13
Supplement: ymj-65-19-s001.pdf [file ymj-65-19-s001.pdf]

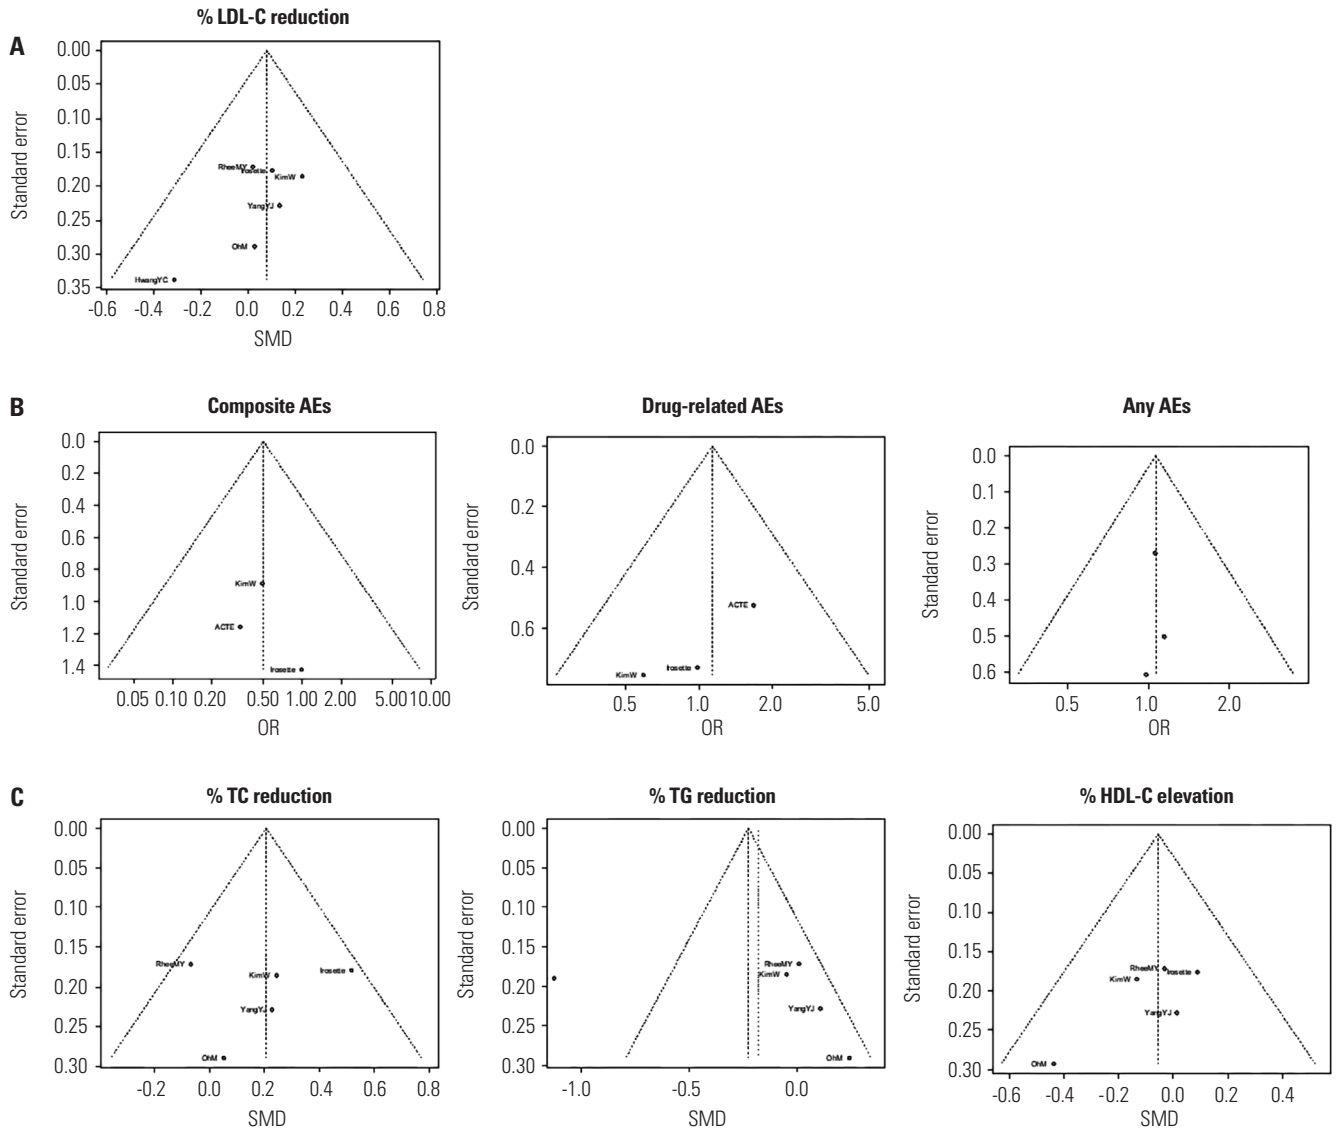

**Supplementary Fig. 1.** Funnel plots for outcome variables. The plots showed no publication bias for % LDL-C reduction (A), rates of AEs (B), and % changes of other lipid parameters (C). LDL-C, low-density lipoprotein cholesterol; SMD, standardized mean difference; AEs, adverse events; OR, odds ratio; TC, total cholesterol; TG, triglyceride; HDL-C, high-density lipoprotein cholesterol.
